# Supplementary material
Source: MDPI journal article supplement (https://www.mdpi.com/2673-4931/6/1/1)

## Modulated structures and subsolidus phase relations of Labradorite Feldspars

Huifang Xu, Shiyun Jin, and Seungyeol Lee  
University of Wisconsin - Madison  
Department of Geoscience

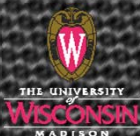

The 2nd International Electronic Conference on Mineral Science  
01/03/2021 - 15/03/2021

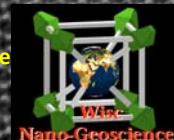

## Feldspar Minerals

- Most abundant
- Tectosilicate
- Three end members (Or, Ab, An)
- Two series
- Plagioclase
- Alkali feldspar

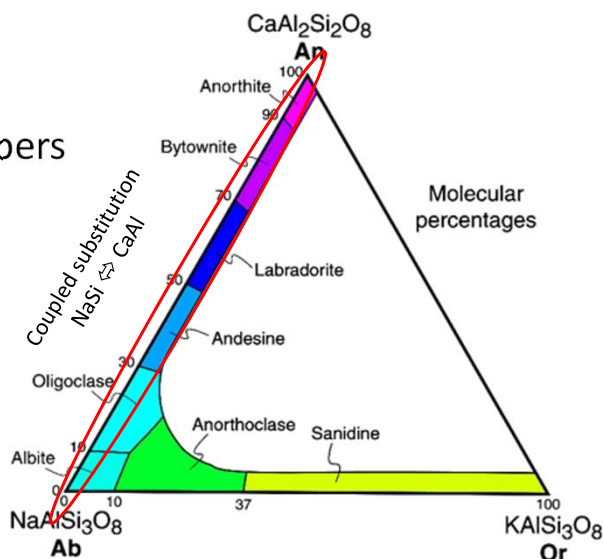

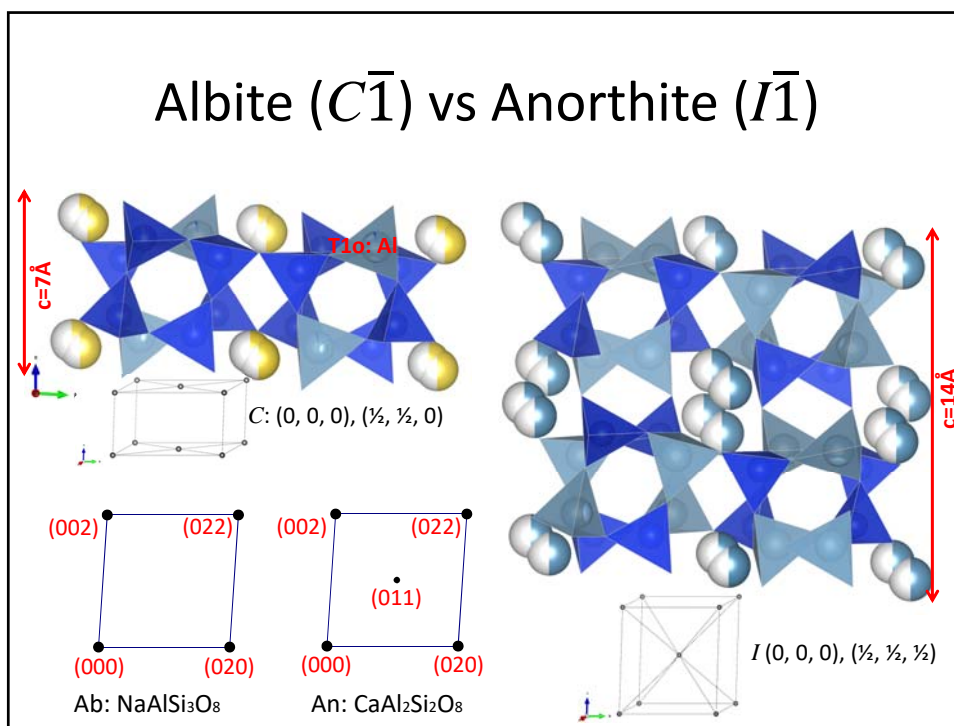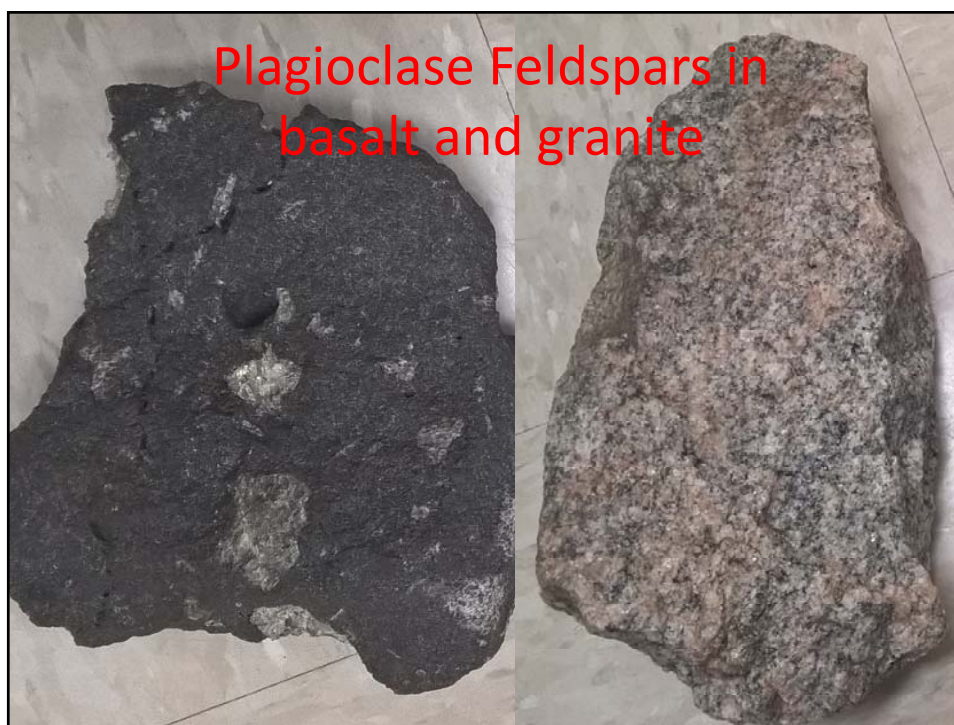

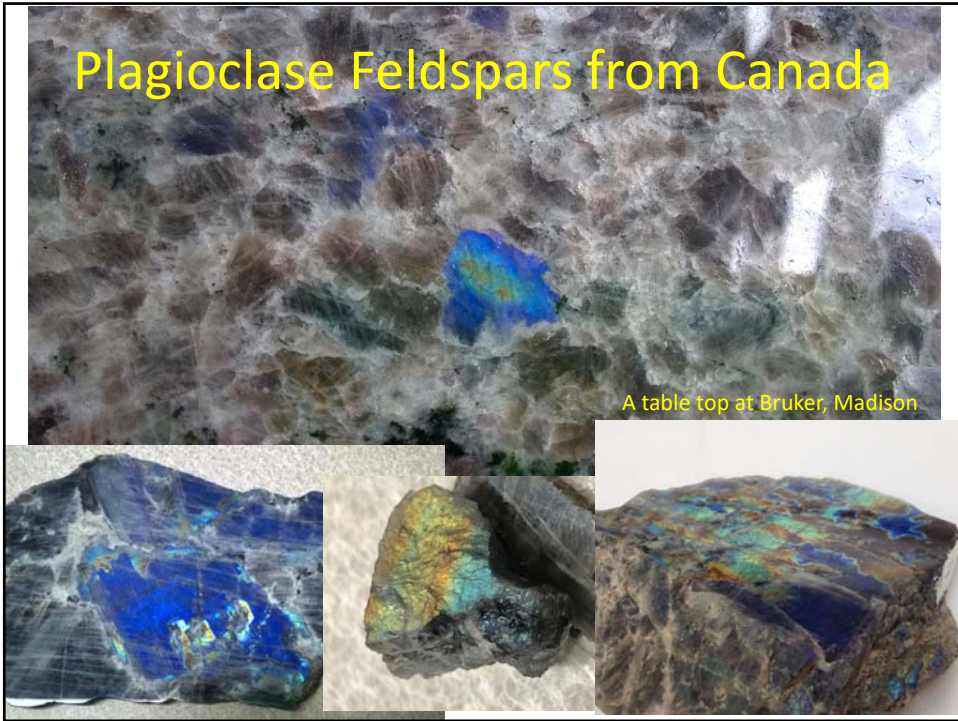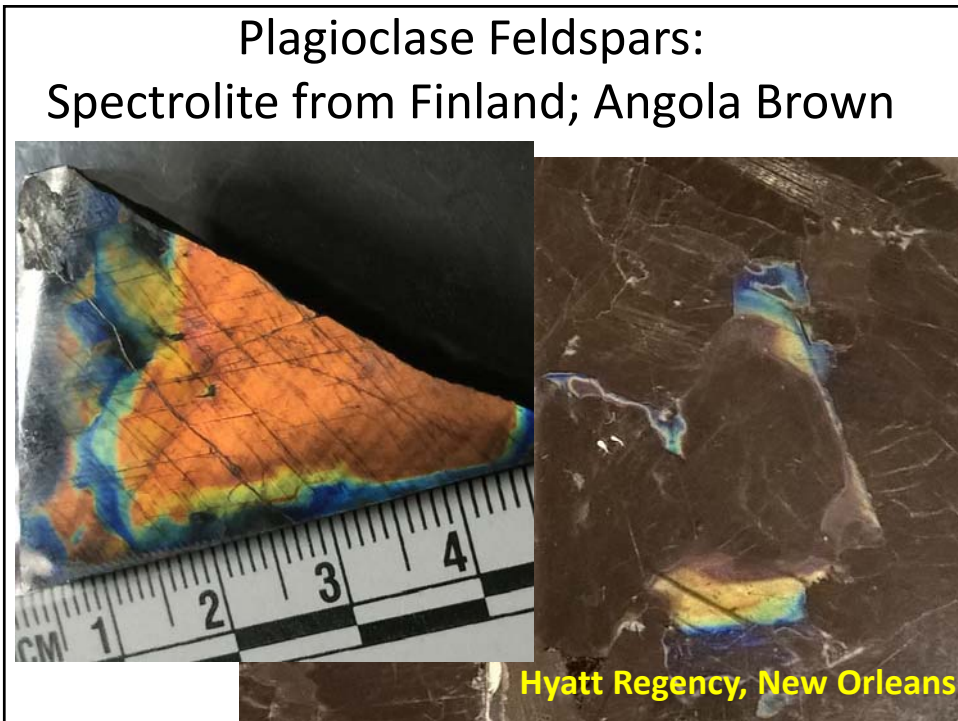

# Sunstones from Oregon and Norway

*American Mineralogist, Volume 102, pages 2146-2149, 2017*

LETTER

SPECIAL COLLECTION: NANOMINERALS AND MINERAL NANOPARTICLES

## Protoenstatite: A new mineral in Oregon sunstones with “watermelon” colors

HUIFANG XU<sup>1,\*</sup>, TINA R. HILL<sup>1,§</sup>, HIROMI KONISHI<sup>1,†</sup>, AND GABRIELA FARFAN<sup>2,‡</sup>

NASA Astrobiology Institute, Department of Geoscience, University of Wisconsin-Madison, Madison, Wisconsin 53706, U.S.A.  
<sup>2</sup>Madison West High School, 30 Ash Street, Madison, Wisconsin 53726, U.S.A.



Oregon State Stone

5 mm

C

In volcanic rocks, cooled down fast.

## Plagioclase Feldspars from Madagascar and Ukraine (Volga Blue)



## Sweden

- Sweden
- **Red:**  $An_{52} = An_{56} + An_{46}$
- **Blue:**  $An_{50} = An_{55} + An_{45}$

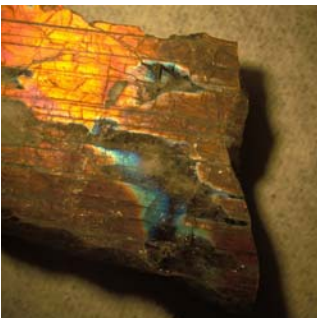




## Plagioclase Phase Diagram

**A** Smith, 1974

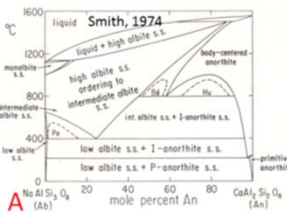

**B** Smith, 1984



**C** McConnell, 2008



**D** Carpenter, 1994



**E** Grove et al., 1986



**F** Vinograd et al., 2001





**Albite** *c<sub>1</sub>*

**Anorthite** *i<sub>1</sub>*

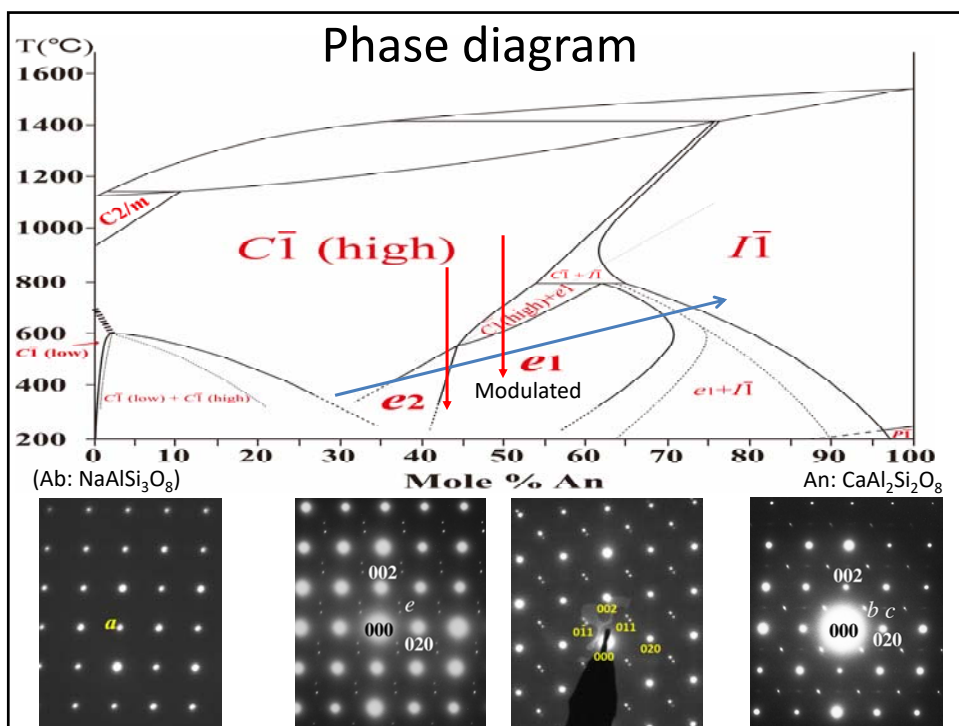

## Structure Models for e-plagioclase

- First discovered in 1940 by Chao and Taylor
- All reported models are lamellar models:
- $I1$  (An) domains + APBs
- $I1$  (An) +  $C1$  (Ab) +  $I1^*$  (An) +  $C1$  (Ab)
- **Very different models (Jogodzinski group, 1981; Yamomoto and Morimoto group, 1984) were proposed based on exact same set of data**

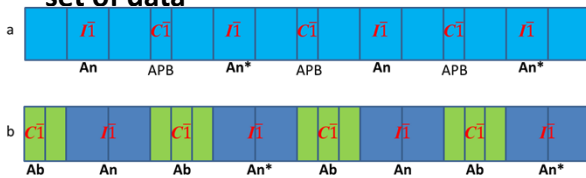

(Ab:  $\text{NaAlSi}_3\text{O}_8$ )

An:  $\text{CaAl}_2\text{Si}_2\text{O}_8$

Megaw, McConnell,  
Bailey's group,  
Wenk's group,  
Jogodzinski's group,

Smith & Ribbe,  
Morimoto's group,  
Grove,  
Toman & Frueh,

## e-plagioclase problem

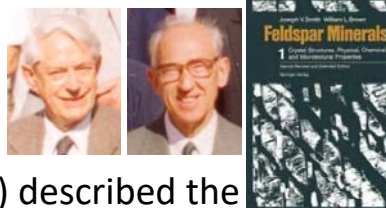

Smith & Brown (1988) (page 113) described the problem quite well: *“It must be stated that quite frankly, although each group of scientists has produced an impressive set of data and conclusions, there has been no comprehensive attempt to make comparative tests in the true spirit of scientific inquiry. All models appear to contain considerable truth, but it is not clear how much of the ‘elephant’ has been described! The hunters must set up a joint safari, and collect new data at low temperature on specimens which span the entire composition range of e-plagioclase.”*

## Single-crystal XRD

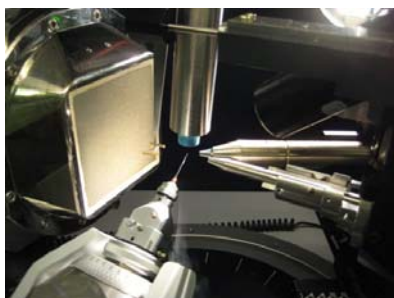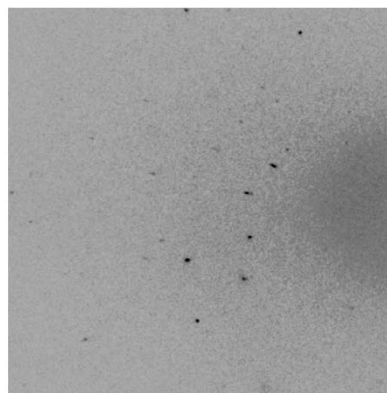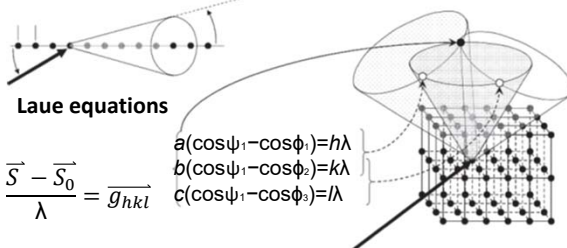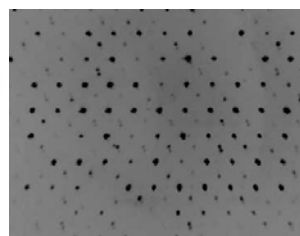

## Neutron Time-of-Flight Laue

Combine de Broglie's equation with Bragg's

$$\lambda = \frac{h}{mv} = \frac{ht}{m(L_1 + L_2)}$$

$$\lambda = 2d \sin \theta$$

$$t = \frac{m}{h} (L_1 + L_2) \times 2d \sin \theta$$

Neutron Time-of-flight Laue  
(Wavelength-resolved Laue)  
3-D Reciprocal Space Mapping

## TEM/STEM: a nano-lab, not just a lens

NSF-MRI: DMR-0619368

Incident high-keV electron beam  
Backscattered electrons (BSE)  
Secondary electrons (SE)  
Specimen  
Scanning Probe  
1.6 Å  
Characteristic X-ray (for EDS & EDS Mapping)  
Energy (keV)

Incoherently scattered electrons (for Z-contrast imaging)  
 $I \sim Z^2$   
Annular Detector  
Z-contrast image  
Z = 33 Z = 31

Elastically scattered electrons (for electron diffraction, BF, DF, & HRTEM imaging)  
GIF (Imaging Filter)  
Inelastically scattered electrons (for energy-filtered imaging, EELS, & EELS mapping)



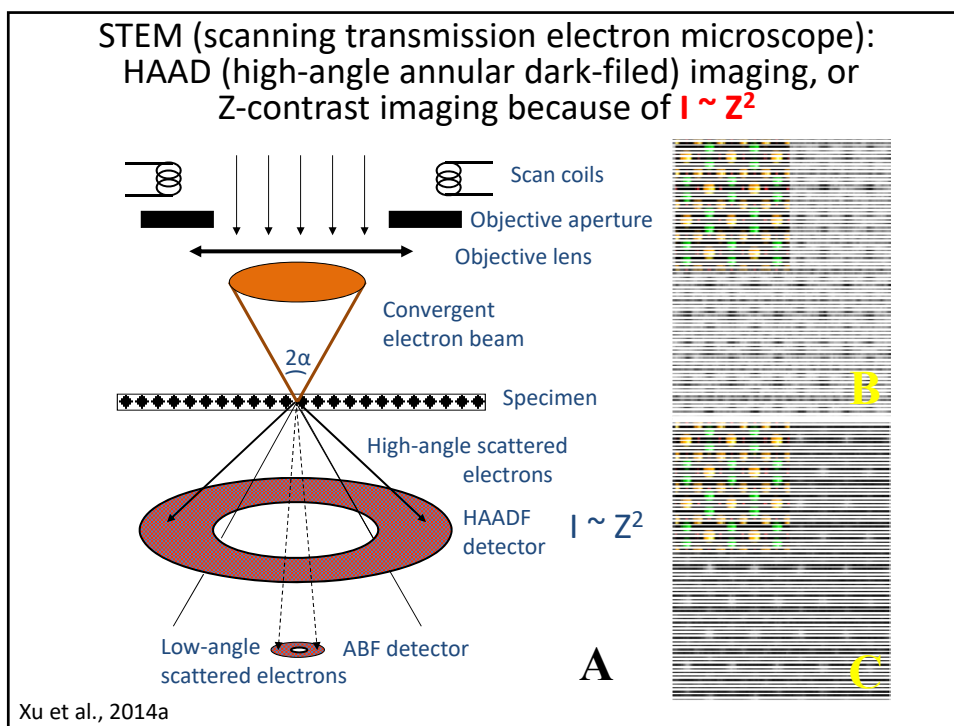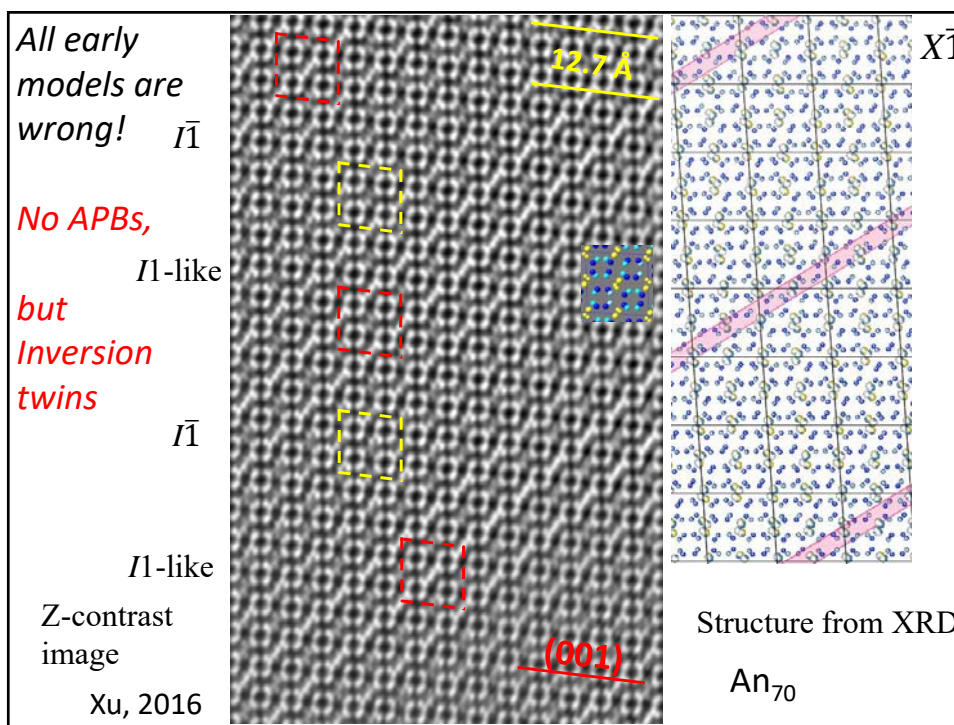

Solved: The enigma of labradorite feldspar with incommensurately modulated structure <sup>c</sup>SHIYUN JIN<sup>1</sup> AND HUIFANG XU<sup>1,\*</sup><sup>1</sup>NASA Astrobiology Institute, Department of Geoscience, University of Wisconsin–Madison, Madison, Wisconsin 53706, U.S.A.

## ABSTRACT

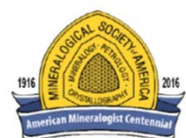

X-ray diffraction. The result structure can be simplified as alternating  $I\bar{1}$ -like lamellae domains related by inversion twins. The inversion boundary shows an orthite-like structure with  $I\bar{1}$  symmetry and is richer in Ca than the neighboring domains with opposite polarity. No albite-like subunits appear in the

Intermediate plagioclase feldspars are the most abundant minerals in the Earth's crust. Their incommensurately modulated structure has puzzled geologists and crystallographers for decades since the phenomenon in a labradorite was reported in 1940. Solving the structure is a necessary step toward mapping the complex subsolidus phase relations of plagioclase solid solution. The structure of a homogeneous labradorite ( $An_{51}$ ) single crystal from a metamorphic rock is solved and refined from single-crystal

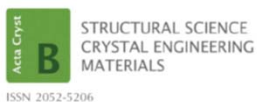

ISSN 2052-5206

## Incommensurate density modulation in a Na-rich plagioclase feldspar: Z-contrast imaging and single-crystal X-ray diffraction study

Huifang Xu,<sup>a\*</sup> Shiyun Jin<sup>a</sup> and Bruce C. Noll<sup>b</sup>Received 24 June 2016  
Accepted 6 October 2016<sup>a</sup>Department of Geoscience, University of Wisconsin–Madison, 1215 W. Dayton St., Madison, WI 53706, USA, and <sup>b</sup>Bruker AXS Inc., 5465 E. Cheryl Parkway, Madison, WI 53711, USA. \*Correspondence e-mail: hfxu@geology.wisc.edu*e*-plagioclase:  $X\bar{1}$ 

- Intermediate composition
- $\sim An_{25} - \sim An_{75}$

**3+1D space group:**

$X\bar{1}(\alpha\beta\gamma)0$  superspace group setting, with  $c \sim 14\text{\AA}$  subcell and a centering condition of  $(0\ 0\ 0\ 0)$ ,  $(\frac{1}{2}\ \frac{1}{2}\ \frac{1}{2}\ 0)$ ,  $(0\ 0\ \frac{1}{2}\ \frac{1}{2})$ ,  $(\frac{1}{2}\ \frac{1}{2}\ 0\ \frac{1}{2})$

 $X\bar{1}(\alpha\beta\gamma)0$  $X\bar{1}(\delta h\ \delta k\ \delta l)0$ **Wave vector**

$$q = \delta h + \delta k - \delta l$$

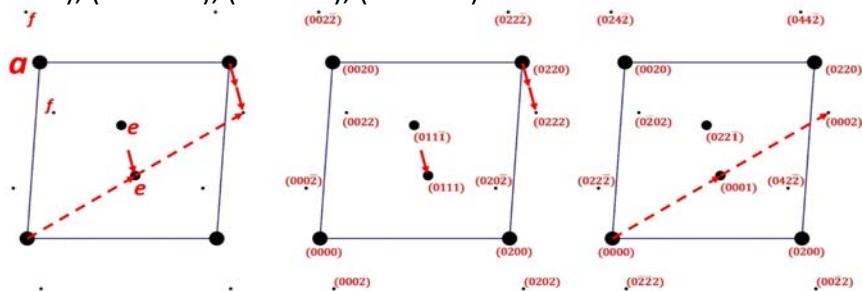A Miller index:  $(hkml)$  B Xu, Jin, & Noll, 2016 C

Structure of a plagioclase (An51):  $X\bar{1}$   
 Movie: [100]-zone axis

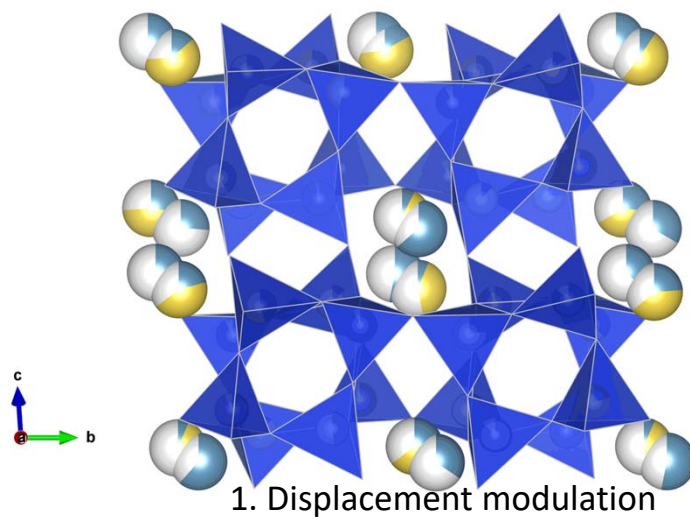

Jin, & Xu,  
2017a

2. Occupational modulation:  
 Al-Si occupancies (neutron diffraction)

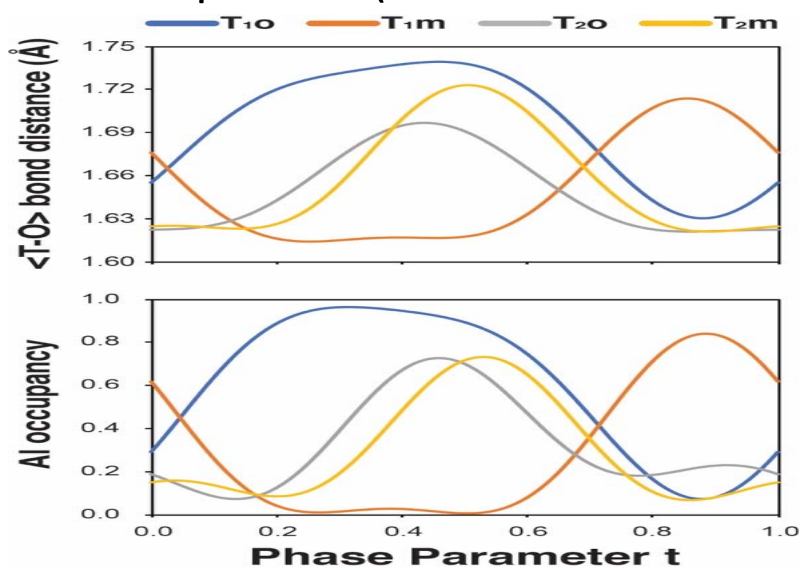

### 3. Density modulation (first observation) 8 M (Ca+Na) sites within one unit cell

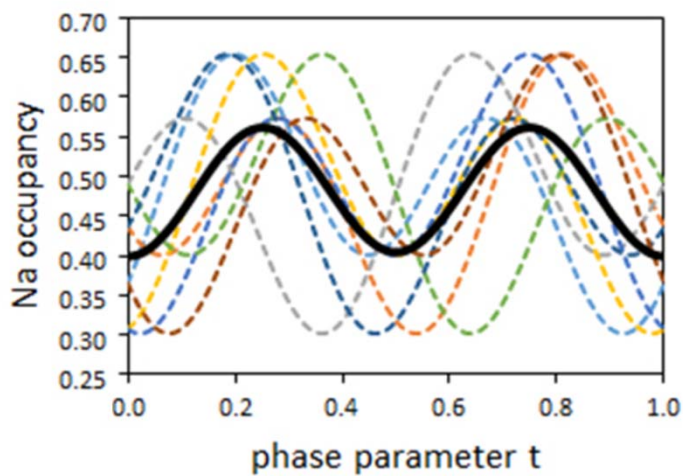

Jin, &amp; Xu, 2017a

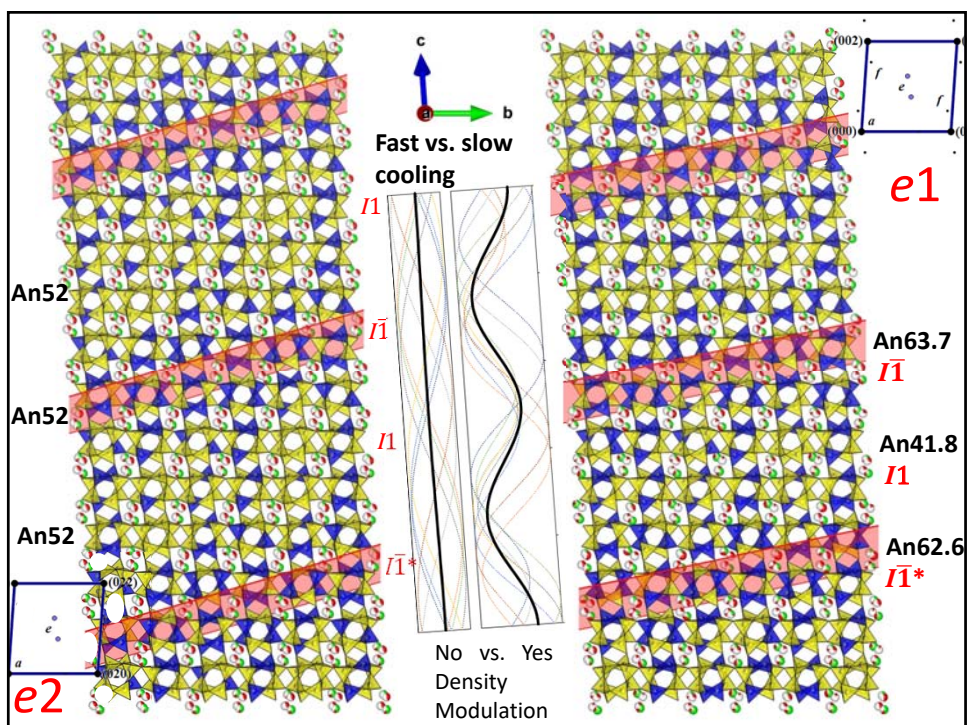

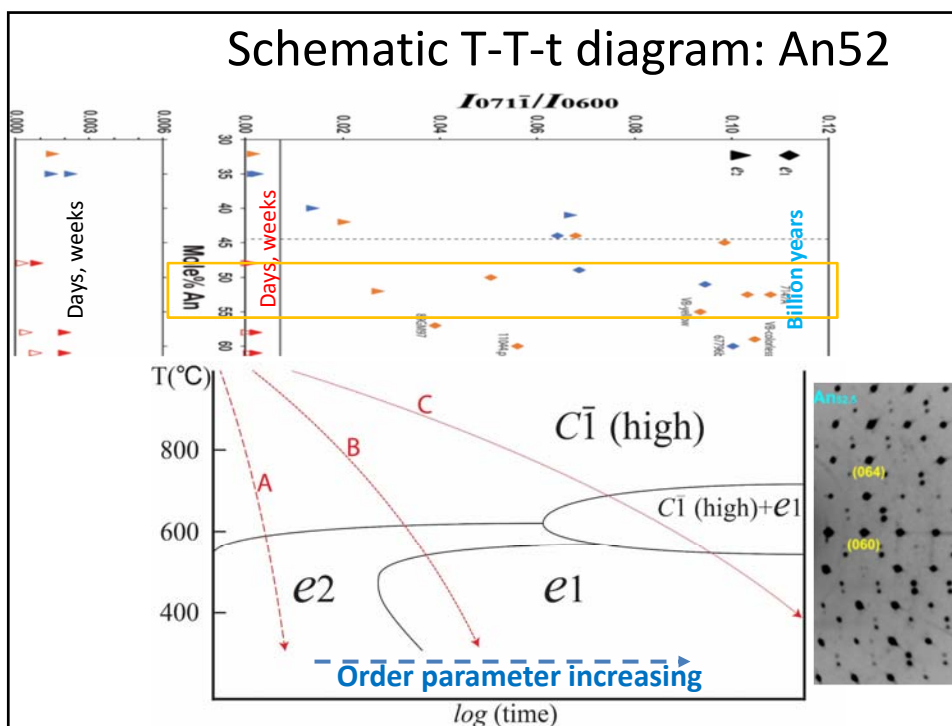

## Acknowledgements

- NSF – MRI Program (for a FEI Titan 80-200 series Cs-corrected FEG-HRTEM/STEM, EAR Petrology / Geochemistry, Paleontology / Sedimentology, and Instrumentation Programs)
- NAAS Astrobiology Institute
- US DOE (BES and Subsurface Programs)
- Wisconsin Alumni Research Foundation
- Dr. Ilia Guzei (UW-Madison) and Dr. Bruce Noll (Bruker)

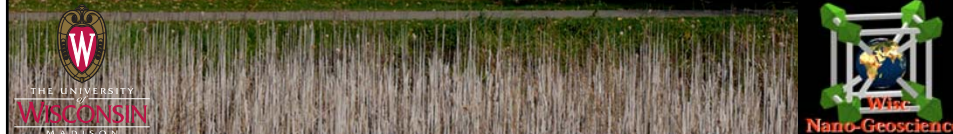

Supplement: s1 [file s1]
